# Supplementary material
Source: PubMed Central journal article supplement (PMC7482110)
Supplement: Supp_Fig2-Table1.pdf [file Supp_Fig2-Table1.pdf]

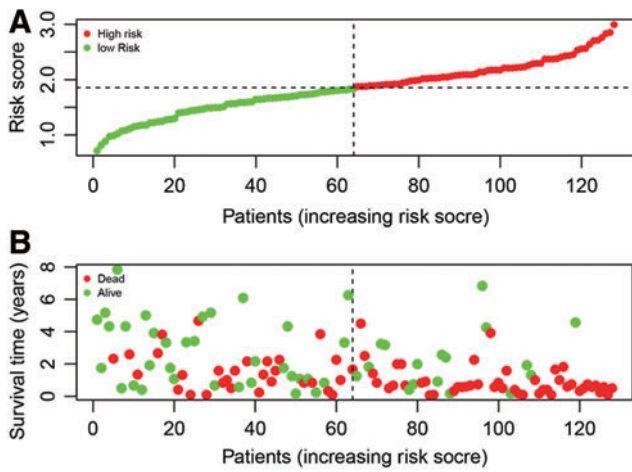

**SUPPLEMENTARY FIG. S2.** (A) Risk score distribution of the six-autophagy-related gene signature, *red dots* represent high risk and *green dots* represent low risk. (B) Scatter plot displaying the survival status of AML patients in the OS model, *red dots* represent the dead and *green dots* represent the patients who are alive.

**SUPPLEMENTARY TABLE S1. DIFFERENT EXPRESSION AUTOPHAGY-RELATED GENES IN GSE1159**

| <i>Gene symbol</i> | <i>AveExpr</i> | <i>LogFC</i> | <i>p</i> | <i>Adj. p</i> |
|--------------------|----------------|--------------|----------|---------------|
| IPPK               | 6.707836       | -0.6018      | 5.24E-14 | 2.08E-11      |
| FOXO1              | 6.638833       | -1.31814     | 1.02E-13 | 2.08E-11      |
| BCL2L1             | 5.664          | -1.28298     | 4.05E-13 | 5.53E-11      |
| ITGA3              | 5.975191       | 0.597602     | 1.20E-11 | 1.23E-09      |
| C5                 | 5.812638       | 0.782863     | 2.14E-11 | 1.75E-09      |
| HSPB8              | 5.952367       | 0.641515     | 2.68E-11 | 1.83E-09      |
| ARSA               | 7.434716       | 0.851438     | 6.70E-11 | 3.92E-09      |
| MYOM1              | 5.656599       | 0.500932     | 1.68E-10 | 8.61E-09      |
| TMEM39A            | 6.255261       | -0.65692     | 2.11E-10 | 9.60E-09      |
| PINK1              | 7.682175       | 0.507614     | 2.71E-10 | 1.11E-08      |
| FAM134B            | 5.016953       | -0.60139     | 9.86E-10 | 3.67E-08      |
| DDIT3              | 8.271122       | 1.440454     | 1.11E-08 | 3.24E-07      |
| WIPI1              | 5.17127        | -1.10703     | 2.74E-08 | 7.49E-07      |
| FCGR3B             | 6.425424       | -1.19398     | 4.61E-08 | 1.18E-06      |
| CDKN1B             | 8.132531       | -1.43798     | 7.13E-08 | 1.72E-06      |
| FBXO7              | 9.847752       | -0.85893     | 8.97E-08 | 2.04E-06      |
| MAP2K1             | 8.673138       | -1.03228     | 2.86E-07 | 5.59E-06      |
| ZNF189             | 4.550334       | -0.75152     | 4.20E-07 | 7.82E-06      |
| HDAC1              | 9.009715       | 0.869406     | 4.41E-07 | 7.86E-06      |
| DNAJB9             | 6.000425       | -0.80527     | 6.03E-07 | 1.03E-05      |
| NFE2L2             | 8.145392       | -0.84718     | 8.16E-07 | 1.29E-05      |
| CHAF1B             | 5.76547        | -0.50371     | 1.36E-06 | 2.06E-05      |
| DAP                | 8.638311       | 0.531253     | 2.93E-06 | 4.01E-05      |
| MAPK1              | 7.549141       | -0.6797      | 3.17E-06 | 4.07E-05      |
| PTEN               | 7.5596         | 0.59424      | 4.35E-06 | 5.41E-05      |
| LAMP2              | 7.473301       | 0.901246     | 5.00E-06 | 6.02E-05      |
| SERPINB10          | 5.930287       | -0.76514     | 9.49E-06 | 0.000102      |
| CXCR4              | 10.42784       | -1.59504     | 9.93E-06 | 0.000104      |
| CALCOCO2           | 9.503198       | 0.835738     | 1.14E-05 | 0.000112      |
| KLHL24             | 6.78171        | 0.611003     | 1.62E-05 | 0.000141      |
| RAB1A              | 8.282968       | 0.560274     | 1.77E-05 | 0.000151      |
| ATG2A              | 7.954709       | -0.51266     | 1.90E-05 | 0.000159      |
| HIST1H3G           | 7.076209       | 0.680636     | 2.02E-05 | 0.000166      |
| BNIP3L             | 8.895302       | -0.88984     | 2.63E-05 | 0.000208      |
| TREM1              | 8.051871       | -1.71509     | 3.41E-05 | 0.000264      |
| NTHL1              | 5.905755       | 0.844473     | 4.52E-05 | 0.000319      |
| ATPIF1             | 9.087575       | -0.56038     | 5.19E-05 | 0.000355      |
| ATF4               | 10.80208       | 0.625251     | 5.86E-05 | 0.000388      |
| EIF2AK3            | 6.200995       | -0.95991     | 7.24E-05 | 0.000471      |
| VAMP8              | 10.31766       | 0.615233     | 8.79E-05 | 0.000554      |
| UBQLN2             | 7.018886       | 1.011947     | 9.52E-05 | 0.000591      |
| LAMTOR2            | 8.110448       | 0.582405     | 9.88E-05 | 0.000604      |
| S100A9             | 11.00707       | -2.76469     | 0.000114 | 0.00067       |
| PFKP               | 8.330692       | 0.864849     | 0.000135 | 0.000761      |
| BIRC5              | 6.923467       | -0.6345      | 0.000143 | 0.000793      |
| MAP1S              | 6.167428       | 0.656173     | 0.000154 | 0.000831      |
| OPTN               | 6.470183       | -0.68471     | 0.000193 | 0.000985      |
| ITPR1              | 6.764999       | 0.606915     | 0.000207 | 0.001037      |
| S100A8             | 9.344939       | -1.73614     | 0.000256 | 0.001235      |
| PRKAA1             | 5.512809       | 0.522007     | 0.00045  | 0.002034      |
| DAPK1              | 6.758408       | 0.622951     | 0.000729 | 0.003216      |
| VPS37C             | 7.31042        | -0.55389     | 0.001211 | 0.005016      |
| DRAM1              | 7.399425       | 0.641307     | 0.001224 | 0.005017      |
| CASP3              | 6.739968       | 0.657432     | 0.001372 | 0.005482      |
| BAX                | 6.226386       | 0.578454     | 0.002934 | 0.010108      |
| NAMPT              | 8.039446       | -1.17984     | 0.003445 | 0.011674      |
| FAS                | 6.163774       | -0.50293     | 0.003495 | 0.011745      |
| XBP1               | 9.771154       | 0.628137     | 0.00377  | 0.012567      |
| VEGFA              | 6.835215       | -0.61668     | 0.005148 | 0.016488      |
| ANXA5              | 8.624568       | -1.21251     | 0.005469 | 0.017384      |
| ATP1B1             | 7.310118       | 1.234743     | 0.006171 | 0.018881      |
| FOXO3              | 8.854046       | -0.66898     | 0.007001 | 0.020951      |
| DNAJB1             | 8.482266       | -0.64316     | 0.008313 | 0.024698      |
| PPP1R15A           | 9.149207       | 0.625345     | 0.008787 | 0.02555       |
| FKBP1B             | 5.798453       | -0.6673      | 0.014567 | 0.038041      |
| SERPINA1           | 7.324556       | -1.08154     | 0.017615 | 0.044037      |
