# Supplementary material
Source: PubMed Central journal article supplement (PMC7482110)
Supplement: Supp_Table2.pdf [file Supp_Table2.pdf]

SUPPLEMENTARY TABLE S2. COX REGRESSION ANALYSIS  
OF 66 DIFFERENTIALLY EXPRESSED  
AUTOPHAGY-RELATED GENES IN ACUTE MYELOID  
LEUKEMIA PATIENTS

| <i>Id</i> | <i>HR</i> | <i>HR.95L</i> | <i>HR.95H</i> | <i>p</i> |
|-----------|-----------|---------------|---------------|----------|
| VPS37C    | 1.243871  | 1.073803      | 1.440874      | 0.003623 |
| LAMTOR2   | 1.088321  | 1.026682      | 1.15366       | 0.004439 |
| HIST1H3G  | 2.977512  | 1.304261      | 6.797396      | 0.009578 |
| CASP3     | 0.966701  | 0.939642      | 0.994538      | 0.019384 |
| KLHL24    | 0.928745  | 0.870806      | 0.990538      | 0.024498 |
| HDAC1     | 1.05893   | 1.007295      | 1.113212      | 0.024773 |
| VEGFA     | 0.862247  | 0.752526      | 0.987965      | 0.032817 |
| CHAF1B    | 1.262636  | 1.009141      | 1.579808      | 0.041395 |
| OPTN      | 1.086199  | 1.003154      | 1.17612       | 0.041593 |
| EIF2AK3   | 0.813142  | 0.660327      | 1.001322      | 0.051472 |
| DNAJB9    | 0.878836  | 0.770359      | 1.002588      | 0.054668 |
| MAP2K1    | 1.038754  | 0.997457      | 1.081762      | 0.066216 |
| ATG2A     | 1.100239  | 0.988139      | 1.225056      | 0.081451 |
| FBXO7     | 1.043534  | 0.993951      | 1.095591      | 0.086221 |
| MAPK1     | 1.041936  | 0.993173      | 1.093093      | 0.092986 |
| LAMP2     | 0.974811  | 0.945952      | 1.004551      | 0.096148 |
| UBQLN2    | 1.082342  | 0.984426      | 1.189997      | 0.101938 |
| DNAJB1    | 1.030882  | 0.992533      | 1.070712      | 0.115848 |
| ITPR1     | 1.04482   | 0.986287      | 1.106826      | 0.136077 |
| FKBP1B    | 0.689898  | 0.417365      | 1.140391      | 0.147716 |
| PINK1     | 1.195143  | 0.928021      | 1.539154      | 0.16722  |
| NTHL1     | 1.11843   | 0.948314      | 1.319062      | 0.183665 |
| PRKAA1    | 0.953769  | 0.885199      | 1.027651      | 0.213705 |
| DDIT3     | 1.00538   | 0.996641      | 1.014196      | 0.228332 |
| BIRC5     | 1.047441  | 0.956123      | 1.147481      | 0.3193   |
| FOXO3     | 0.946788  | 0.845492      | 1.060221      | 0.34359  |
| MAP1S     | 1.028454  | 0.967779      | 1.092932      | 0.365825 |
| C5        | 0.935065  | 0.796456      | 1.097796      | 0.412122 |
| ATF4      | 0.997111  | 0.989972      | 1.004303      | 0.43012  |
| WIPI1     | 0.948647  | 0.8282        | 1.086611      | 0.446671 |
| PTEN      | 0.986172  | 0.951265      | 1.02236       | 0.448875 |
| BCL2L1    | 1.012789  | 0.979884      | 1.046799      | 0.450788 |
| CDKN1B    | 1.022557  | 0.964502      | 1.084106      | 0.454466 |
| VAMP8     | 1.002004  | 0.996366      | 1.007673      | 0.486855 |
| BAX       | 1.008846  | 0.979848      | 1.038702      | 0.553938 |
| IPPK      | 0.767714  | 0.311429      | 1.892515      | 0.565814 |
| SERPINB10 | 1.00899   | 0.97618       | 1.042903      | 0.595679 |
| RAB1A     | 1.010992  | 0.968559      | 1.055284      | 0.617276 |
| HSPB8     | 18.10362  | 7.60E-05      | 4312686       | 0.646616 |
| NFE2L2    | 1.021239  | 0.933408      | 1.117334      | 0.646923 |
| BNIP3L    | 0.994501  | 0.965448      | 1.024428      | 0.715482 |
| ZNF189    | 0.977711  | 0.861003      | 1.110239      | 0.728172 |
| DAP       | 1.004354  | 0.976131      | 1.033393      | 0.765143 |
| ITGA3     | 1.070327  | 0.660649      | 1.734051      | 0.782487 |
| FOXO1     | 1.004976  | 0.963809      | 1.047902      | 0.816057 |
| TMEM39A   | 0.985684  | 0.868584      | 1.118571      | 0.823176 |
| MYOM1     | 0.982299  | 0.642629      | 1.501507      | 0.934256 |
| FAS       | 0.996758  | 0.903027      | 1.100218      | 0.948612 |
| FCGR3B    | 1.000186  | 0.946937      | 1.056429      | 0.994682 |
